# Supplementary material for: Comorbidity and thirty-day hospital readmission odds in chronic obstructive pulmonary disease: a comparison of the Charlson and Elixhauser comorbidity indices
Source: Springer Nature journal article supplement (doi:10.1186/s12913-019-4549-4), 2019-10-15
Supplement: MOESM3 [file 17275014]

Supplemental Table: Multilevel Logistic Regression models of Readmission using Charlson

Index using Hospital Level random intercept

| <b>Model Info</b>                                  | <b>Model 1</b>     |                   | <b>Model 2</b>     |          | <b>Model 3</b>     |          |
|----------------------------------------------------|--------------------|-------------------|--------------------|----------|--------------------|----------|
| N                                                  | 1,662,983          |                   | 1,659,576          |          | 1,658,372          |          |
| LL                                                 | -1,702,361.6       |                   | -1,693,222.5       |          | -1,683,418.1       |          |
| df                                                 | 3                  |                   | 22                 |          | 41                 |          |
| AIC                                                | 3,404,729.3        |                   | 3,386,489.0        |          | 3,366,918.3        |          |
| BIC                                                | 3,404,766.3        |                   | 3,386,760.0        |          | 3,367,423.5        |          |
| <b>Predictors</b>                                  | <b>OR (95% CI)</b> | <b>P</b>          | <b>OR (95% CI)</b> | <b>P</b> | <b>OR (95% CI)</b> | <b>P</b> |
| <b>Charlson Index (per 1)</b>                      | 1.15 (1.15, 1.15)  | <.001             | 1.14 (1.13, 1.14)  | <.001    | 1.12 (1.12, 1.12)  | <.001    |
| <b>Year (ref=2010)</b>                             |                    |                   |                    |          |                    |          |
| 2011                                               |                    | 1.00 (0.97, 1.02) | 0.709              |          | 1.00 (0.97, 1.02)  | 0.673    |
| 2012                                               |                    | 0.96 (0.94, 0.98) | <.001              |          | 0.96 (0.94, 0.98)  | <.001    |
| 2013                                               |                    | 0.93 (0.91, 0.95) | <.001              |          | 0.93 (0.91, 0.95)  | <.001    |
| 2014                                               |                    | 0.92 (0.90, 0.94) | <.001              |          | 0.92 (0.90, 0.94)  | <.001    |
| 2015                                               |                    | 0.88 (0.87, 0.90) | <.001              |          | 0.88 (0.86, 0.90)  | <.001    |
| 2016                                               |                    | 0.88 (0.86, 0.90) | <.001              |          | 0.87 (0.85, 0.89)  | <.001    |
| <b>Quarter (ref=1<sup>st</sup>)</b>                |                    |                   |                    |          |                    |          |
| 2 <sup>nd</sup> Quarter                            |                    | 0.97 (0.95, 0.98) | <.001              |          | 0.97 (0.96, 0.98)  | <.001    |
| 3 <sup>rd</sup> Quarter                            |                    | 1.01 (0.99, 1.02) | 0.411              |          | 1.01 (1.00, 1.02)  | 0.167    |
| 4 <sup>th</sup> Quarter                            |                    | 0.99 (0.97, 1.00) | 0.038              |          | 0.99 (0.98, 1.01)  | 0.277    |
| <b>Sex (ref=male)</b>                              |                    |                   |                    |          |                    |          |
| Female                                             |                    | 0.94 (0.93, 0.95) | <.001              |          | 0.92 (0.91, 0.93)  | <.001    |
| <b>Age (per 10 year)</b>                           |                    | 1.00 (0.99, 1.00) | 0.796              |          | 0.97 (0.97, 0.98)  | <.001    |
| <b>Income Quartile (ref=1<sup>st</sup>)</b>        |                    |                   |                    |          |                    |          |
| 2 <sup>nd</sup> Quartile                           |                    | 0.98 (0.97, 1.00) | 0.019              |          | 0.98 (0.97, 0.99)  | 0.003    |
| 3 <sup>rd</sup> Quartile                           |                    | 0.98 (0.97, 1.00) | 0.015              |          | 0.97 (0.95, 0.98)  | <.001    |
| 4 <sup>th</sup> Quartile                           |                    | 0.97 (0.95, 0.99) | <.001              |          | 0.94 (0.93, 0.96)  | <.001    |
| Missing                                            |                    | 0.96 (0.93, 1.00) | 0.073              |          | 0.97 (0.93, 1.00)  | 0.083    |
| <b>Payer (ref=Medicare)</b>                        |                    |                   |                    |          |                    |          |
| Medicaid                                           |                    | 1.07 (1.05, 1.09) | <.001              |          | 1.08 (1.06, 1.10)  | <.001    |
| Private                                            |                    | 0.67 (0.66, 0.68) | <.001              |          | 0.69 (0.68, 0.71)  | <.001    |
| Self-Pay                                           |                    | 0.59 (0.57, 0.61) | <.001              |          | 0.62 (0.60, 0.64)  | <.001    |
| Other/No Charge                                    |                    | 0.77 (0.75, 0.80) | <.001              |          | 0.79 (0.77, 0.82)  | <.001    |
| <b>Disposition (ref=Routine to home)</b>           |                    |                   |                    |          |                    |          |
| Post-acute care                                    |                    |                   |                    |          | 1.30 (1.28, 1.32)  | <.001    |
| Other                                              |                    |                   |                    |          | 1.13 (1.06, 1.20)  | <.001    |
| Home Health                                        |                    |                   |                    |          | 1.35 (1.33, 1.37)  | <.001    |
| <b>Length of Stay (per day)</b>                    |                    |                   |                    |          | 1.02 (1.02, 1.02)  | <.001    |
| <b>Care intensity (ref=No)</b>                     |                    |                   |                    |          |                    |          |
| Non-invasive ventilation                           |                    |                   |                    |          | 1.16 (1.14, 1.18)  | <.001    |
| Mechanical ventilation                             |                    |                   |                    |          | 0.95 (0.92, 0.97)  | <.001    |
| Tracheostomy                                       |                    |                   |                    |          | 1.02 (0.97, 1.09)  | 0.425    |
| Cardiac arrest                                     |                    |                   |                    |          | 0.82 (0.74, 0.91)  | <.001    |
| CPR                                                |                    |                   |                    |          | 1.08 (0.95, 1.24)  | 0.242    |
| <b>Hospital ownership (ref=government)</b>         |                    |                   |                    |          |                    |          |
| Private, non-profit                                |                    |                   |                    |          | 0.99 (0.98, 1.01)  | 0.437    |
| Private, for-profit                                |                    |                   |                    |          | 1.04 (1.01, 1.06)  | <.001    |
| <b>Hospital teaching status (ref=Non-teaching)</b> |                    |                   |                    |          |                    |          |
| Teaching Hospital                                  |                    |                   |                    |          | 1.01 (0.99, 1.02)  | 0.423    |
| <b>Hospital location (ref=Large metro area)</b>    |                    |                   |                    |          |                    |          |
| Small metro area                                   |                    |                   |                    |          | 0.94 (0.92, 0.95)  | <.001    |

|                                      |                   |       |
|--------------------------------------|-------------------|-------|
| <i>Metropolitan area</i>             | 0.89 (0.87, 0.91) | <.001 |
| <i>Rural</i>                         | 0.87 (0.84, 0.90) | <.001 |
| <b>Hospital Bed Size (ref=Small)</b> |                   |       |
| <i>Medium</i>                        | 1.01 (0.99, 1.03) | 0.174 |
| <i>Large</i>                         | 1.02 (1.00, 1.04) | 0.040 |
| <b>Annual Discharge (per 10k)</b>    | 1.01 (1.00, 1.02) | 0.130 |
| <b>Proportion Medicaid per 10%</b>   | 1.00 (1.00, 1.01) | 0.531 |
