# Supplementary material for: Comorbidity and thirty-day hospital readmission odds in chronic obstructive pulmonary disease: a comparison of the Charlson and Elixhauser comorbidity indices
Source: Springer Nature journal article supplement (doi:10.1186/s12913-019-4549-4), 2019-10-15
Supplement: MOESM5 [file 17275014]

Supplemental Table: Charlson and Elixhauser Indices (with 95% CI) over time per ½ standard deviation increase

|                   | 2010              | 2011              | 2012              | 2013              | 2014              | 2015              | 2016              |
|-------------------|-------------------|-------------------|-------------------|-------------------|-------------------|-------------------|-------------------|
| <b>Charlson</b>   |                   |                   |                   |                   |                   |                   |                   |
| Model 1           | 1.11 (1.11, 1.12) | 1.11 (1.10, 1.12) | 1.11 (1.10, 1.12) | 1.11 (1.10, 1.12) | 1.11 (1.10, 1.12) | 1.11 (1.11, 1.12) | 1.11 (1.10, 1.11) |
| Model 2           | 1.10 (1.09, 1.11) | 1.10 (1.09, 1.11) | 1.10 (1.09, 1.11) | 1.10 (1.09, 1.11) | 1.10 (1.09, 1.11) | 1.11 (1.10, 1.11) | 1.10 (1.09, 1.10) |
| Model 3           | 1.09 (1.08, 1.10) | 1.09 (1.08, 1.10) | 1.09 (1.08, 1.09) | 1.09 (1.08, 1.10) | 1.09 (1.08, 1.10) | 1.10 (1.09, 1.10) | 1.09 (1.08, 1.09) |
| <b>Elixhauser</b> |                   |                   |                   |                   |                   |                   |                   |
| Model 1           | 1.16 (1.15, 1.17) | 1.16 (1.15, 1.17) | 1.15 (1.14, 1.15) | 1.15 (1.14, 1.16) | 1.15 (1.14, 1.16) | 1.15 (1.14, 1.16) | 1.15 (1.14, 1.16) |
| Model 2           | 1.14 (1.14, 1.15) | 1.15 (1.14, 1.16) | 1.14 (1.13, 1.14) | 1.14 (1.13, 1.15) | 1.14 (1.13, 1.15) | 1.14 (1.14, 1.15) | 1.14 (1.14, 1.15) |
| Model 3           | 1.13 (1.12, 1.14) | 1.13 (1.12, 1.14) | 1.12 (1.11, 1.13) | 1.12 (1.12, 1.13) | 1.12 (1.11, 1.13) | 1.13 (1.12, 1.14) | 1.12 (1.12, 1.13) |

Model 2 adjusted for age, sex, income, time period (year and quarter), and insurer.

Model 3 adjusted for Model 2 covariates as well as discharge disposition, hospital length of stay, care intensity, and hospital characteristics (ownership type, teaching hospital status, location, size, annual number of discharges, and proportion Medicaid patients).
