# Supplementary material for: Comorbidity and thirty-day hospital readmission odds in chronic obstructive pulmonary disease: a comparison of the Charlson and Elixhauser comorbidity indices
Source: Springer Nature journal article supplement (doi:10.1186/s12913-019-4549-4), 2019-10-15
Supplement: MOESM7 [file 17275014]

Supplemental Table: Multilevel Logistic Regression models of Readmission using  
 Charlson Index using Hospital Level random intercept (age 18 and older)

| Model Info                                         | Model 1           |       | Model 2           |       | Model 3           |       |
|----------------------------------------------------|-------------------|-------|-------------------|-------|-------------------|-------|
| N                                                  | 1,682,629         |       | 1,679,169         |       | 1,677,941         |       |
| LL                                                 | -1,720,155.5      |       | -1,710,735.8      |       | -1,700,884.0      |       |
| df                                                 | 3                 |       | 22                |       | 41                |       |
| AIC                                                | 3,440,317.0       |       | 3,421,515.5       |       | 3,401,850.0       |       |
| BIC                                                | 3,440,354.0       |       | 3,421,786.8       |       | 3,402,355.8       |       |
| Predictors                                         | OR (95% CI)       | P     | OR (95% CI)       | P     | OR (95% CI)       | P     |
| <b>Charlson Index (per 1)</b>                      | 1.15 (1.15, 1.15) | <.001 | 1.14 (1.13, 1.14) | <.001 | 1.12 (1.12, 1.12) | <.001 |
| <b>Year (ref=2010)</b>                             |                   |       |                   |       |                   |       |
| 2011                                               |                   |       | 1.00 (0.97, 1.02) | 0.658 | 0.99 (0.97, 1.02) | 0.611 |
| 2012                                               |                   |       | 0.96 (0.94, 0.98) | <.001 | 0.96 (0.94, 0.98) | <.001 |
| 2013                                               |                   |       | 0.93 (0.91, 0.95) | <.001 | 0.93 (0.91, 0.95) | <.001 |
| 2014                                               |                   |       | 0.92 (0.90, 0.94) | <.001 | 0.92 (0.90, 0.94) | <.001 |
| 2015                                               |                   |       | 0.89 (0.87, 0.90) | <.001 | 0.88 (0.86, 0.90) | <.001 |
| 2016                                               |                   |       | 0.88 (0.86, 0.90) | <.001 | 0.87 (0.85, 0.89) | <.001 |
| <b>Quarter (ref=1<sup>st</sup>)</b>                |                   |       |                   |       |                   |       |
| 2 <sup>nd</sup> Quarter                            |                   |       | 0.97 (0.95, 0.98) | <.001 | 0.97 (0.96, 0.98) | <.001 |
| 3 <sup>rd</sup> Quarter                            |                   |       | 1.00 (0.99, 1.02) | 0.523 | 1.01 (0.99, 1.02) | 0.232 |
| 4 <sup>th</sup> Quarter                            |                   |       | 0.98 (0.97, 1.00) | 0.017 | 0.99 (0.98, 1.00) | 0.162 |
| <b>Sex (ref=male)</b>                              |                   |       |                   |       |                   |       |
| Female                                             |                   |       | 0.94 (0.93, 0.95) | <.001 | 0.92 (0.91, 0.93) | <.001 |
| <b>Age (per 10 year)</b>                           |                   |       | 1.00 (1.00, 1.01) | 0.101 | 0.98 (0.97, 0.98) | <.001 |
| <b>Income Quartile (ref=1<sup>st</sup>)</b>        |                   |       |                   |       |                   |       |
| 2 <sup>nd</sup> Quartile                           |                   |       | 0.98 (0.97, 1.00) | 0.017 | 0.98 (0.97, 0.99) | 0.002 |
| 3 <sup>rd</sup> Quartile                           |                   |       | 0.98 (0.97, 1.00) | 0.010 | 0.97 (0.95, 0.98) | <.001 |
| 4 <sup>th</sup> Quartile                           |                   |       | 0.97 (0.95, 0.98) | <.001 | 0.94 (0.93, 0.96) | <.001 |
| Missing                                            |                   |       | 0.97 (0.93, 1.01) | 0.086 | 0.97 (0.93, 1.01) | 0.098 |
| <b>Payer (ref=Medicare)</b>                        |                   |       |                   |       |                   |       |
| Medicaid                                           |                   |       | 1.07 (1.05, 1.09) | <.001 | 1.08 (1.06, 1.09) | <.001 |
| Private                                            |                   |       | 0.67 (0.66, 0.68) | <.001 | 0.69 (0.68, 0.70) | <.001 |
| Self-Pay                                           |                   |       | 0.59 (0.57, 0.61) | <.001 | 0.62 (0.60, 0.64) | <.001 |
| Other/No Charge                                    |                   |       | 0.77 (0.75, 0.80) | <.001 | 0.79 (0.77, 0.82) | <.001 |
| <b>Disposition (ref=Routine to home)</b>           |                   |       |                   |       |                   |       |
| Post-acute care                                    |                   |       |                   |       | 1.29 (1.27, 1.32) | <.001 |
| Other                                              |                   |       |                   |       | 1.13 (1.06, 1.20) | <.001 |
| Home Health                                        |                   |       |                   |       | 1.35 (1.33, 1.37) | <.001 |
| <b>Length of Stay (per day)</b>                    |                   |       |                   |       | 1.02 (1.02, 1.02) | <.001 |
| <b>Care intensity (ref=No)</b>                     |                   |       |                   |       |                   |       |
| Non-invasive ventilation                           |                   |       |                   |       | 1.16 (1.14, 1.18) | <.001 |
| Mechanical ventilation                             |                   |       |                   |       | 0.95 (0.92, 0.97) | <.001 |
| Tracheostomy                                       |                   |       |                   |       | 1.03 (0.97, 1.09) | 0.387 |
| Cardiac arrest                                     |                   |       |                   |       | 0.82 (0.74, 0.91) | <.001 |
| CPR                                                |                   |       |                   |       | 1.08 (0.94, 1.23) | 0.262 |
| <b>Hospital ownership (ref=government)</b>         |                   |       |                   |       |                   |       |
| Private, non-profit                                |                   |       |                   |       | 0.99 (0.97, 1.01) | 0.394 |
| Private, for-profit                                |                   |       |                   |       | 1.04 (1.02, 1.06) | <.001 |
| <b>Hospital teaching status (ref=Non-teaching)</b> |                   |       |                   |       |                   |       |
| Teaching Hospital                                  |                   |       |                   |       | 1.01 (0.99, 1.02) | 0.307 |
| <b>Hospital location (ref=Large metro area)</b>    |                   |       |                   |       |                   |       |

|                                       |                   |       |
|---------------------------------------|-------------------|-------|
| <i>Small metro area</i>               | 0.94 (0.92, 0.95) | <.001 |
| <i>Metropolitan area</i>              | 0.89 (0.87, 0.91) | <.001 |
| <i>Rural</i>                          | 0.87 (0.84, 0.90) | <.001 |
| <hr/>                                 |                   |       |
| <b>Hospital Bed Size (ref=Small)</b>  |                   |       |
| <i>Medium</i>                         | 1.01 (0.99, 1.03) | 0.207 |
| <i>Large</i>                          | 1.02 (1.00, 1.04) | 0.049 |
| <hr/>                                 |                   |       |
| <b>Annual Discharge (per 10k)</b>     | 1.01 (1.00, 1.02) | 0.098 |
| <hr/>                                 |                   |       |
| <b>Proportion of Medicaid per 10%</b> | 1.00 (1.00, 1.01) | 0.548 |
