# Supplementary material for: Comorbidity and thirty-day hospital readmission odds in chronic obstructive pulmonary disease: a comparison of the Charlson and Elixhauser comorbidity indices
Source: Springer Nature journal article supplement (doi:10.1186/s12913-019-4549-4), 2019-10-15
Supplement: MOESM8 [file 17275014]

Supplemental Table: Multilevel Logistic Regression models of Readmission using Elixhauser Index using Hospital Level random intercept (age 18 and older)

| <b>Model Info</b>                                  | <b>Model 1</b>     |          | <b>Model 2</b>     |          | <b>Model 3</b>     |          |
|----------------------------------------------------|--------------------|----------|--------------------|----------|--------------------|----------|
| N                                                  | 1,682,629          |          | 1,679,169          |          | 1,677,941          |          |
| LL                                                 | -1,709,883.6       |          | -1,701,310.5       |          | -1,695,230.0       |          |
| df                                                 | 3                  |          | 22                 |          | 41                 |          |
| AIC                                                | 3,419,773.3        |          | 3,402,665.0        |          | 3,390,542.0        |          |
| BIC                                                | 3,419,810.3        |          | 3,402,936.3        |          | 3,391,047.8        |          |
| <b>Predictors</b>                                  | <b>OR (95% CI)</b> | <b>P</b> | <b>OR (95% CI)</b> | <b>P</b> | <b>OR (95% CI)</b> | <b>P</b> |
| <b>Elixhauser Index (per 3)</b>                    | 1.06 (1.06, 1.06)  | <.001    | 1.05 (1.05, 1.06)  | <.001    | 1.05 (1.05, 1.05)  | <.001    |
| <b>Year (ref=2010)</b>                             |                    |          |                    |          |                    |          |
| 2011                                               |                    |          | 0.99 (0.97, 1.01)  | 0.469    | 0.99 (0.97, 1.01)  | 0.432    |
| 2012                                               |                    |          | 0.95 (0.93, 0.97)  | <.001    | 0.95 (0.93, 0.97)  | <.001    |
| 2013                                               |                    |          | 0.91 (0.89, 0.93)  | <.001    | 0.91 (0.89, 0.93)  | <.001    |
| 2014                                               |                    |          | 0.89 (0.87, 0.91)  | <.001    | 0.89 (0.87, 0.90)  | <.001    |
| 2015                                               |                    |          | 0.86 (0.84, 0.88)  | <.001    | 0.86 (0.84, 0.88)  | <.001    |
| 2016                                               |                    |          | 0.86 (0.84, 0.88)  | <.001    | 0.85 (0.83, 0.87)  | <.001    |
| <b>Quarter (ref=1<sup>st</sup>)</b>                |                    |          |                    |          |                    |          |
| 2 <sup>nd</sup> Quarter                            |                    |          | 0.96 (0.95, 0.98)  | <.001    | 0.97 (0.95, 0.98)  | <.001    |
| 3 <sup>rd</sup> Quarter                            |                    |          | 1.00 (0.98, 1.01)  | 0.618    | 1.00 (0.99, 1.01)  | 0.912    |
| 4 <sup>th</sup> Quarter                            |                    |          | 0.98 (0.97, 1.00)  | 0.008    | 0.99 (0.97, 1.00)  | 0.044    |
| <b>Sex (ref=male)</b>                              |                    |          |                    |          |                    |          |
| Female                                             |                    |          | 0.93 (0.93, 0.94)  | <.001    | 0.92 (0.91, 0.92)  | <.001    |
| <b>Age (per 10 year)</b>                           |                    |          |                    |          |                    |          |
|                                                    |                    |          | 1.01 (1.00, 1.01)  | <.001    | 0.99 (0.98, 0.99)  | <.001    |
| <b>Income Quartile (ref=1<sup>st</sup>)</b>        |                    |          |                    |          |                    |          |
| 2 <sup>nd</sup> Quartile                           |                    |          | 0.98 (0.97, 1.00)  | 0.033    | 0.98 (0.97, 1.00)  | 0.008    |
| 3 <sup>rd</sup> Quartile                           |                    |          | 0.98 (0.97, 1.00)  | 0.012    | 0.97 (0.95, 0.98)  | <.001    |
| 4 <sup>th</sup> Quartile                           |                    |          | 0.97 (0.95, 0.99)  | <.001    | 0.95 (0.93, 0.97)  | <.001    |
| Missing                                            |                    |          | 0.97 (0.93, 1.01)  | 0.164    | 0.97 (0.93, 1.01)  | 0.156    |
| <b>Payer (ref=Medicare)</b>                        |                    |          |                    |          |                    |          |
| Medicaid                                           |                    |          | 1.06 (1.05, 1.08)  | <.001    | 1.07 (1.05, 1.09)  | <.001    |
| Private                                            |                    |          | 0.70 (0.68, 0.71)  | <.001    | 0.71 (0.70, 0.72)  | <.001    |
| Self-Pay                                           |                    |          | 0.61 (0.59, 0.63)  | <.001    | 0.63 (0.61, 0.65)  | <.001    |
| Other/No Charge                                    |                    |          | 0.78 (0.76, 0.81)  | <.001    | 0.80 (0.77, 0.82)  | <.001    |
| <b>Disposition (ref=Routine to home)</b>           |                    |          |                    |          |                    |          |
| Post-acute care                                    |                    |          |                    |          | 1.20 (1.18, 1.22)  | <.001    |
| Other                                              |                    |          |                    |          | 1.07 (1.00, 1.14)  | 0.037    |
| Home Health                                        |                    |          |                    |          | 1.30 (1.28, 1.32)  | <.001    |
| <b>Length of Stay (per day)</b>                    |                    |          |                    |          |                    |          |
|                                                    |                    |          |                    |          | 1.01 (1.01, 1.01)  | <.001    |
| <b>Care intensity (ref=No)</b>                     |                    |          |                    |          |                    |          |
| Non-invasive ventilation                           |                    |          |                    |          | 1.09 (1.07, 1.11)  | <.001    |
| Mechanical ventilation                             |                    |          |                    |          | 0.82 (0.79, 0.84)  | <.001    |
| Tracheostomy                                       |                    |          |                    |          | 1.05 (0.99, 1.11)  | 0.114    |
| Cardiac arrest                                     |                    |          |                    |          | 0.82 (0.74, 0.90)  | <.001    |
| CPR                                                |                    |          |                    |          | 1.08 (0.95, 1.24)  | 0.233    |
| <b>Hospital ownership (ref=government)</b>         |                    |          |                    |          |                    |          |
| Private, non-profit                                |                    |          |                    |          | 0.98 (0.96, 1.00)  | 0.017    |
| Private, for-profit                                |                    |          |                    |          | 1.03 (1.01, 1.06)  | 0.001    |
| <b>Hospital teaching status (ref=Non-teaching)</b> |                    |          |                    |          |                    |          |
| Teaching Hospital                                  |                    |          |                    |          | 1.00 (0.99, 1.02)  | 0.937    |
| <b>Hospital location (ref=Large metro area)</b>    |                    |          |                    |          |                    |          |
| Small metro area                                   |                    |          |                    |          | 0.93 (0.92, 0.95)  | <.001    |

|                                       |                   |       |
|---------------------------------------|-------------------|-------|
| <i>Metropolitan area</i>              | 0.90 (0.88, 0.92) | <.001 |
| <i>Rural</i>                          | 0.89 (0.86, 0.92) | <.001 |
| <b>Hospital Bed Size (ref=Small)</b>  |                   |       |
| <i>Medium</i>                         | 1.01 (0.99, 1.03) | 0.447 |
| <i>Large</i>                          | 1.01 (0.99, 1.03) | 0.463 |
| <b>Annual Discharge (per 10k)</b>     | 1.01 (1.00, 1.03) | 0.008 |
| <b>Proportion of Medicaid per 10%</b> | 1.00 (0.99, 1.01) | 0.840 |
