# Supplementary material for: Comorbidity and thirty-day hospital readmission odds in chronic obstructive pulmonary disease: a comparison of the Charlson and Elixhauser comorbidity indices
Source: Springer Nature journal article supplement (doi:10.1186/s12913-019-4549-4), 2019-10-15
Supplement: MOESM10 [file 17275014]

Supplemental Table: Comparisons between covariate-only and comorbidity index models

| Index Type       |                | Model 2       |    | Model 3       |    |
|------------------|----------------|---------------|----|---------------|----|
|                  |                | LL            | DF | LL            | DF |
| Charlson Index   | Covariate Only | -1,702,657.30 | 21 | -1,690,687.40 | 40 |
|                  | With Index     | -1,693,222.5  | 22 | -1,683,418.1  | 41 |
|                  | -2LL $\Delta$  | 18,869.6      | 1  | 14,538.6      | 1  |
| Elixhauser Index | Covariate Only | -1,702,657.30 | 21 | -1,690,687.40 | 40 |
|                  | With Index     | -1,683,905.4  | 22 | -1,677,856.3  | 41 |
|                  | -2LL $\Delta$  | 37,503.8      | 1  | 25,662.2      | 1  |
