# Supplementary material for: Comorbidity and thirty-day hospital readmission odds in chronic obstructive pulmonary disease: a comparison of the Charlson and Elixhauser comorbidity indices
Source: Springer Nature journal article supplement (doi:10.1186/s12913-019-4549-4), 2019-10-15
Supplement: MOESM11 [file 17275014]

Supplemental Table: Pooled cohort characteristics of patients, stratified by hospital teaching status.

|                                                                                 | Not Readmitted            |                       | Readmitted                |                       | P     |
|---------------------------------------------------------------------------------|---------------------------|-----------------------|---------------------------|-----------------------|-------|
|                                                                                 | Non-Teaching<br>N=816,734 | Teaching<br>N=558,365 | Non-Teaching<br>N=167,891 | Teaching<br>N=119,993 |       |
| <b>Sex, %</b>                                                                   |                           |                       |                           |                       |       |
| Male                                                                            | 40.7%                     | 40.9%                 | 42.8%                     | 42.7%                 | <.001 |
| Female                                                                          | 59.3%                     | 59.1%                 | 57.2%                     | 57.3%                 |       |
| <b>Age, Mean ± SD</b>                                                           | 68.1 ± 11.9               | 67.6 ± 12.0           | 69.0 ± 11.7               | 68.3 ± 11.8           | <.001 |
| <b>Median household income by ZIP code, %</b>                                   |                           |                       |                           |                       |       |
| 1st Quartile                                                                    | 38.2%                     | 35.2%                 | 38.3%                     | 36.3%                 |       |
| 2nd Quartile                                                                    | 28.5%                     | 24.2%                 | 28.1%                     | 24.0%                 | <.001 |
| 3rd Quartile                                                                    | 19.8%                     | 22.7%                 | 19.8%                     | 22.1%                 |       |
| 4th Quartile                                                                    | 11.8%                     | 16.8%                 | 12.3%                     | 16.5%                 |       |
| Missing                                                                         | 1.6%                      | 1.1%                  | 1.6%                      | 1.1%                  |       |
| <b><sup>1</sup>Patient geographic location, %</b>                               |                           |                       |                           |                       |       |
| Central county metro area ≥1M                                                   | 13.6%                     | 34.4%                 | 14.5%                     | 36.2%                 |       |
| Fringe county metro area ≥1M                                                    | 24.3%                     | 24.6%                 | 26.0%                     | 24.9%                 |       |
| County metro area 250,000-999,999k                                              | 17.3%                     | 26.2%                 | 17.1%                     | 25.0%                 | <.001 |
| County metro area 50,000-249,999k                                               | 11.2%                     | 9.1%                  | 11.2%                     | 8.6%                  |       |
| Micropolitan area                                                               | 20.5%                     | 2.3%                  | 19.2%                     | 2.2%                  |       |
| Non-metro/non-micropolitan (rural)                                              | 13.1%                     | 3.4%                  | 12.0%                     | 3.1%                  |       |
| <b><sup>2</sup>Primary Payer, %</b>                                             |                           |                       |                           |                       |       |
| Medicare (includes dual-eligible)                                               | 70.7%                     | 67.9%                 | 75.6%                     | 72.5%                 |       |
| Medicaid                                                                        | 10.5%                     | 13.6%                 | 11.6%                     | 15.0%                 | <.001 |
| Private insurance                                                               | 12.4%                     | 12.1%                 | 8.5%                      | 8.1%                  |       |
| Self-pay                                                                        | 3.4%                      | 3.4%                  | 1.9%                      | 2.0%                  |       |
| Other, including no-charge                                                      | 3.1%                      | 3.0%                  | 2.5%                      | 2.3%                  |       |
| <b>Number of admissions each patient had over a year, Mean ± SD</b>             | 2.10 ± 1.56               | 2.16 ± 1.64           | 4.23 ± 2.42               | 4.42 ± 2.60           | <.001 |
| <b>Number hospitals where each patient received care over a year, Mean ± SD</b> | 1.31 ± 0.64               | 1.31 ± 0.65           | 1.43 ± 0.74               | 1.45 ± 0.76           | <.001 |
| <b>Discharge disposition, %</b>                                                 |                           |                       |                           |                       |       |
| Routine to home                                                                 | 69.9%                     | 67.7%                 | 60.7%                     | 59.2%                 |       |
| Transfer to post-acute care                                                     | 12.4%                     | 12.4%                 | 16.3%                     | 16.2%                 | <.001 |
| Home with home health services                                                  | 0.9%                      | 0.6%                  | 0.9%                      | 0.6%                  |       |
| Other                                                                           | 16.8%                     | 19.3%                 | 22.0%                     | 24.1%                 |       |
| <b><sup>§</sup>Length of Stay, Mean ± SD</b>                                    | 3.64 ± 1.88               | 3.71 ± 2.09           | 4.12 ± 2.28               | 4.20 ± 2.51           | <.001 |
| <b>Care intensity and complications, %</b>                                      |                           |                       |                           |                       |       |
| Use of non-invasive ventilation                                                 | 6.8%                      | 8.9%                  | 8.8%                      | 10.9%                 | <.001 |
| Use of mechanical ventilation                                                   | 4.1%                      | 5.1%                  | 5.3%                      | 6.2%                  | <.001 |
| Placement or presents of tracheostomy                                           | 0.6%                      | 1.0%                  | 0.9%                      | 1.5%                  | <.001 |
| Cardiac arrest                                                                  | 0.2%                      | 0.2%                  | 0.2%                      | 0.3%                  | <.001 |
| Performance of CPR                                                              | 0.1%                      | 0.1%                  | 0.2%                      | 0.2%                  | <.001 |

Note: Unweighted N's displayed. Frequencies derived using weighted analysis. Continuous variables compared by Welch's T-test and categorical variables by ANOVA.

<sup>§</sup>Geometric Mean and SD for log transformed variable presented

<sup>1</sup>N's 815,953; 557,348; 167,646; 119,650

<sup>2</sup>N's 814,748; 557,466; 167,544; 119,818
