# Supplementary material for: Comorbidity and thirty-day hospital readmission odds in chronic obstructive pulmonary disease: a comparison of the Charlson and Elixhauser comorbidity indices
Source: Springer Nature journal article supplement (doi:10.1186/s12913-019-4549-4), 2019-10-15
Supplement: MOESM12 [file 17275014]

Supplemental Table: Pooled cohort characteristics of patients, stratified by urban/rural hospital location designation.

|                                                                                 | Not Readmitted       |                        | Readmitted         |                       | P     |
|---------------------------------------------------------------------------------|----------------------|------------------------|--------------------|-----------------------|-------|
|                                                                                 | Urban<br>N=1,174,608 | Non-Urban<br>N=200,491 | Urban<br>N=249,881 | Non-Urban<br>N=38,003 |       |
| <b>Sex, %</b>                                                                   |                      |                        |                    |                       |       |
| Male                                                                            | 40.6%                | 41.5%                  | 42.5%              | 43.9%                 | <.001 |
| Female                                                                          | 59.4%                | 58.5%                  | 57.5%              | 56.1%                 |       |
| <b>Age, Mean ± SD</b>                                                           | 67.9 ± 12.3          | 67.6 ± 10.2            | 68.7 ± 12.1        | 68.6 ± 9.9            | <.001 |
| <b>Median household income by ZIP code, %</b>                                   |                      |                        |                    |                       |       |
| 1st Quartile                                                                    | 31.4%                | 61.2%                  | 32.3%              | 62.5%                 |       |
| 2nd Quartile                                                                    | 26.3%                | 28.7%                  | 26.0%              | 28.3%                 | <.001 |
| 3rd Quartile                                                                    | 24.2%                | 7.1%                   | 23.7%              | 6.4%                  |       |
| 4th Quartile                                                                    | 16.9%                | 0.7%                   | 16.9%              | 0.6%                  |       |
| Missing                                                                         | 1.2%                 | 2.3%                   | 1.2%               | 2.3%                  |       |
| <b><sup>1</sup>Patient geographic location, %</b>                               |                      |                        |                    |                       |       |
| Central county metro area ≥1M                                                   | 27.1%                | 0.1%                   | 28.4%              | 0.1%                  |       |
| Fringe county metro area ≥1M                                                    | 29.8%                | 1.2%                   | 30.6%              | 1.3%                  |       |
| County metro area 250,000-999,999k                                              | 25.4%                | 1.7%                   | 24.3%              | 1.7%                  | <.001 |
| County metro area 50,000-249,999k                                               | 12.4%                | 1.6%                   | 11.9%              | 1.5%                  |       |
| Micropolitan area                                                               | 2.2%                 | 60.2%                  | 2.1%               | 60.7%                 |       |
| Non-metro/non-micropolitan (rural)                                              | 3.1%                 | 35.2%                  | 2.8%               | 34.6%                 |       |
| <b><sup>2</sup>Primary Payer, %</b>                                             |                      |                        |                    |                       |       |
| Medicare (includes dual-eligible)                                               | 69.2%                | 71.2%                  | 74.0%              | 75.8%                 |       |
| Medicaid                                                                        | 12.1%                | 10.3%                  | 13.4%              | 11.1%                 | <.001 |
| Private insurance                                                               | 12.4%                | 11.6%                  | 8.4%               | 8.2%                  |       |
| Self-pay                                                                        | 3.3%                 | 3.5%                   | 1.9%               | 1.8%                  |       |
| Other, including no-charge                                                      | 3.0%                 | 3.4%                   | 2.3%               | 3.1%                  |       |
| <b>Number of admissions each patient had over a year, Mean ± SD</b>             | 2.14 ± 1.65          | 2.08 ± 1.35            | 4.34 ± 2.60        | 4.12 ± 2.00           | <.001 |
| <b>Number hospitals where each patient received care over a year, Mean ± SD</b> | 1.31 ± 0.66          | 1.31 ± 0.57            | 1.44 ± 0.77        | 1.44 ± 0.66           | <.001 |
| <b>Discharge disposition, %</b>                                                 |                      |                        |                    |                       |       |
| Routine to home                                                                 | 68.2%                | 72.8%                  | 59.2%              | 64.3%                 |       |
| Transfer to post-acute care                                                     | 12.7%                | 11.3%                  | 16.7%              | 14.1%                 | <.001 |
| Home with home health services                                                  | 0.6%                 | 1.2%                   | 0.7%               | 1.3%                  |       |
| Other                                                                           | 18.5%                | 14.7%                  | 23.4%              | 20.3%                 |       |
| <b><sup>§</sup>Length of Stay, Mean ± SD</b>                                    | 3.73 ± 2.09          | 3.40 ± 1.45            | 4.24 ± 2.53        | 3.77 ± 1.70           | <.001 |
| <b>Care intensity and complications, %</b>                                      |                      |                        |                    |                       |       |
| Use of non-invasive ventilation                                                 | 8.2%                 | 5.6%                   | 10.2%              | 7.2%                  | <.001 |
| Use of mechanical ventilation                                                   | 4.9%                 | 3.1%                   | 6.0%               | 4.0%                  | <.001 |
| Placement or presents of tracheostomy                                           | 0.9%                 | 0.4%                   | 1.3%               | 0.7%                  | <.001 |
| Cardiac arrest                                                                  | 0.2%                 | 0.1%                   | 0.3%               | 0.1%                  | <.001 |
| Performance of CPR                                                              | 0.1%                 | 0.1%                   | 0.2%               | 0.1%                  | <.001 |

Note: Unweighted N's displayed. Frequencies derived using weighted analysis.

<sup>§</sup>Geometric Mean and SD for log transformed variable presented

<sup>1</sup>N's 1,172,883; 200,418; 249,306; 37,990

<sup>2</sup>N's 1,172,701; 199,513; 249,519; 37,843
